# Supplementary material for: Evaluation of 3D-printed Porous titanium alloy versus Polyetheretherketone (PEEK) cages in the surgical treatment of multilevel cervical degenerative disease
Source: Research Square preprint supplement (doi:10.21203/rs.3.rs-4931040/v1), 2024-10-15
Supplement: Supplementary file 1 [file 3e8fca2e30126c3e281be032.docx]

Table 5. Complications by study group

**Complications PEEK 3D-printed TTN**

Dysphagia 10 (15.2) 7 (23.3)

(>3 months) 1 (1.67) 1 (3.33)

Durotomy 1 (1.67) 0 (0.00)

Screw Loosening 3 (5.00) 2 (6.67)

Subsidence 2. (3.33) 6 (20.0)
