# Supplementary material for: Evaluation of 3D-printed Porous titanium alloy versus Polyetheretherketone (PEEK) cages in the surgical treatment of multilevel cervical degenerative disease
Source: Research Square preprint supplement (doi:10.21203/rs.3.rs-4931040/v1), 2024-10-15
Supplement: Supplementary file 2 [file 409abcc613e95714ac5f0e72.docx]

Table 4. Radiographic outcomes by study group

**PEEK, n (%) 3D-printed Titanium, n (%) p**

**2-Level ACDF**

Proximal (level 1) Total Fused 39 (100.0) 12 (100.0) 1

Duration, mo, mean ± SD 11.40 ± 1.2 10.5 ± 4.32 .697

Proximal (Level 1)—Total

6 months 20 (48.3) 7 (58.3)

1 year 10 (32.8) 3 (25.0)

2 years 9 (18.9) 2 (16.6)

Pseudoarthrosis Levels - -

2nd Level total fused 36(92.3) 10 (83.3) .987

Duration, mo, mean ± SD 11.53 ± 1.16 11.45 ± 4.02 .975

2nd Level—Total

6 months 16 (41.0) 5 (36.3)

1 year 14 (35.7) 4 (50)

2 years 6 (15.4) 2 (27.3)

Pseudoarthrosis Levels C5-C6 (1) C5-C6 (1)

C6-7 (3) C6-7 (1)

**3-Level ACDF**

Proximal (Level 1) Total Fused 22 (95.5) 13 (100) .989

Duration, mo, mean ± SD 9.6 ± 0.81 9.23 ± 1.25 .080

Proximal (Level 1)—Total

6 months 9 (39.1) 8 (61.5)

1 year 13 (56.5) 4 (30.7)

2 years 0 (0.00) 1 (07.7)

Pseudoarthrosis Levels C3-C4 (1) -

2nd Level Total Fused 22 (95.5) 11 (84.6) .539

Duration, mo, mean ± SD 14.18 ± 6.41 10.36 ± 2.67 .075

2nd Level—Total

6 months 4 (46.4) 3 (27.3)

1 year 12 (35.7) 8 (72.7)

2 years 6 (40.0) 0 ()

Pseudoarthrosis Levels C5-C6 (1) C5-C6 (1)

C6-C7 (1)

3rd Level Total Fused 17 (73.9) 8 (61.5) .475

Duration, mo, mean ± SD 19.1 ± 5.91 12.0 ± 5.20 .011

3rd Level—total

6 months 0 (0.00) 2 (25.0)

1 year 7 (41.2) 5 (62.5)

2 years 10 (58.9) 1 (12.5)

Pseudoarthrosis Levels C5-C6 (3) C5-C6 (2)

C6-C7 (3) C6-C7 (3)

**4-Level ACDF**

Proximal (Level 1) Total Fused 5 (100) 2 (100) 1

Duration, mo, mean ± SD 12 ± 14.0 18 ± 42.0 .453

Proximal (Level 1)—Total

6 months 3 (60.0) 0 (0.00)

1 year 0 (0.00) 1 (50.0)

2 years 2 (40.0) 1 (50.0)

Pseudoarthrosis Levels - -

2nd Level Total Fused 4(80) 2 (100) 1

Duration, mo, mean ± SD 9.6 ± 13.3 18 ± 33.2 .272

2nd Level—Total

6 months 3 (75.0) 0 (36.3)

1 year 0 (0.00) 1 (50.0)

2 years 1 (25.0) 1 (50.0)

Pseudoarthrosis Levels C4-C5 (1) -

3rd Level Total Fused 5 (100) 2 (100) 1

Duration, mo, mean ± SD 10.8 ± 12.67 18.3 ± 6.3 .483

3rd Level—total

6 months 3 (60.0) 0 (0.00)

1 year 1 (20.0) 1 (50.0)

2 years 1 (20.0) 1 (50.0)

Pseudoarthrosis Levels - -

4th Level Total Fused 2 (40.0) 1 (50.0) 1

Duration, mo, mean ± SD 18 ± 6.00 24 ± 0.00 .489

4th Level—total

6 months 0 (0.00) 0 (0.00)

1 year 1 (50.0) 0 (0.00)

2 years 1 (50.0) 1 (100)

Pseudoarthrosis Levels C6-C7 (3) C6-C7 (1)
