# Supplementary material for: Evaluation of 3D-printed Porous titanium alloy versus Polyetheretherketone (PEEK) cages in the surgical treatment of multilevel cervical degenerative disease
Source: Research Square preprint supplement (doi:10.21203/rs.3.rs-4931040/v1), 2024-10-15
Supplement: Supplementary file 3 [file 53e16c9855939076b4b960af.docx]

Table 3. Clinical outcomes by study group.

**Outcomes PEEK 3D-printed TTN p**

Follow-up, mo, mean ± SD 16.56 ± 2.88 18.48 ± 3.10 .171

Clinical scores, mean ± SD

Visual analog scale

Baseline 5.21 ± 2.39 5.00 ± 3.15 .737

6 mo 2.38 ± 2.50 1.89 ± 2.70 .413

1 y 1.77 ± 2.20 1.07 ± 2.22 .175

2 y 1.63 ± 2.73 1.25 ± 1.42 .597

Neck Disability Index

Baseline 17.2 ± 8.25 15.16 ± 7.50 .410

6 mo 9.26 ± 8.42 10.39 ± 9.19 .611

1 y 11.29 ± 8.67 6.74 ± 5.58 .017

2 y 10.39 ± 8.17 7.08 ± 6.54 .410
