# Supplementary material for: Evaluation of 3D-printed Porous titanium alloy versus Polyetheretherketone (PEEK) cages in the surgical treatment of multilevel cervical degenerative disease
Source: Research Square preprint supplement (doi:10.21203/rs.3.rs-4931040/v1), 2024-10-15
Supplement: Supplementary file 4 [file c2efca0a99a7304bb02531a0.docx]

Table 2. Operated Levels

**Operated Levels PEEK 3D-printed TTN**

**2-Level ACDF**

C3-C5 6 (66.6) 3 (33.3)

C4-C6 13 (76.5) 4 (23.5)

C5-C7 21 (84.0) 4 (16.0)

C6-T1 0 (0.00) 1 (100.0)

**3-Level ACDF**

C3-C6 9 (69.2) 4 (30.8)

C4-C7 11 (57.9) 8 (42.1)

C5-T1 2 (50.0) 2 (50.0)

**4-Level ACDF**

C3-C7 5 (71.4) 2 (28.6)
