# Supplementary material for: Evaluation of 3D-printed Porous titanium alloy versus Polyetheretherketone (PEEK) cages in the surgical treatment of multilevel cervical degenerative disease
Source: Research Square preprint supplement (doi:10.21203/rs.3.rs-4931040/v1), 2024-10-15
Supplement: Supplementary file 5 [file f768c347cfc7aecc2b3a2aec.docx]

Table 1. Demographics/Intraoperative value by study group

**Characteristic PEEK, n (%) 3D-printed TTN, n (%) p**

n 66 (69.7) 30 (30.3)

Age in years 63.21 ± 10.59 63.32 ± 12.70 .468

Sex

Male 23 (34.8) 12 (40.0)

Female 43 (65.2) 18 (60.0)

Osteoporosis 5 (7.58) 3 (10.0) .718

Smoking 9 (13.6) 4 (12.0) .783

Estimated Blood Loss 28.06 ± 11.65 30.88 ± 14.92 .448

Number of Operated Levels 2.61 ± .102 2.42 ± .070 .115

Polyetheretherketone (PEEK), Titanium (TTN)
